# Supplementary material for: Association between Eosinophil Count and Cortisol Concentrations in Equids Admitted in the Emergency Unit with Abdominal Pain
Source: MDPI journal article supplement (doi:10.3390/ani14010164), 2024-01-04
Supplement: s1 [file s1]

**Table S1.** Individual demographic and clinical variables of 39 horses admitted to an equine hospital with acute abdominal pain.

| Breed              | Sex | Age (yo) | T <sup>a</sup> (°C) | HR (ppm) | RR (bpm) | Mucosal membrane | Salivary cortisol (µg/dL) | WBC (× 10 <sup>9</sup> /L) | EC (× 10 <sup>9</sup> /L) | Diagnoses                                           | Survival |
|--------------------|-----|----------|---------------------|----------|----------|------------------|---------------------------|----------------------------|---------------------------|-----------------------------------------------------|----------|
| Crossbreed         | M   | 5        | 37.3                | 32       | 12       | Pales            | 0.94                      | 5.73                       | 0.00                      | Small intestine enteritis and large colon impaction | Yes      |
| Crossbreed         | F   | 5        | 38.6                | 100      | 44       | Pales            | 2.90                      | 13.71                      | 0.00                      | Large colon displacement                            | No       |
| Spanish Pure Breed | M   | 3        | 38.4                | 80       | 24       | Pink             | 0.99                      | 7.92                       | 0.02                      | Pelvic flexure impaction                            | Yes      |
| Spanish Pure Breed | M   | 18       | 38.7                | 40       | 16       | Pales            | 0.27                      | 7.36                       | 0.23                      | Spasmodic colic                                     | Yes      |
| Spanish Pure Breed | M   | 5        | 38.6                | 56       | 12       | Pink             | 0.46                      | 7.34                       | 0.31                      | Large colon displacement                            | Yes      |
| Spanish Pure Breed | M   | 12       | 39                  | 50       | 20       | Pink             | 0.52                      | 18.66                      | 0.13                      | Large colon displacement and small colon impaction  | Yes      |
| Spanish Pure Breed | F   | 5        | 37.5                | 40       | 12       | Pink             | 0.65                      | 12.10                      | 0.24                      | Spasmodic colic                                     | Yes      |
| Spanish Pure Breed | F   | 8        | 39                  | 100      | 40       | Cyanotic         | 1.30                      | 8.91                       | 0.00                      | Large colon displacement                            | No       |
| Crossbreed         | F   | 7        | 38.1                | 90       | 40       | Pink             | 0.30                      | 9.44                       | 0.18                      | Large colon displacement                            | Yes      |

|                    |   |    |      |     |    |           |       |      |      |                                                       |     |
|--------------------|---|----|------|-----|----|-----------|-------|------|------|-------------------------------------------------------|-----|
| Crossbreed         | C |    | 37.5 | 44  | 16 | Pink      | 0.76  | 6.60 | 0.05 | Large colon displacement and pelvic flexure impaction | Yes |
| Pony               | C | 7  | 37   | 44  | 12 | Pales     | 0.96  | 7.21 | 0.06 | Large colon displacement                              | Yes |
| Spanish Pure Breed | M | 8  | 37.4 | 44  | 16 | Pink      | 1.11  | 6.28 | 0.01 | Pelvic flexure impaction                              | Yes |
| Spanish Pure Breed | M | 3  | 37.7 | 44  | 16 | Pink      | 1.12  | 9.36 | 0.04 | Large colon displacement and small colon impaction    | Yes |
| Crossbreed         | C | 14 | 37.8 | 44  | 12 | Pink      | 0.59  | 4.49 | 0.11 | Pelvic flexure impaction                              | Yes |
| Spanish Pure Breed | M | 6  | 38.2 | 64  | 12 | Congested | 0.67  | 3.61 | 0.00 | Duodenitis and proximal jejunitis                     | Yes |
| Warm blood         | C | 16 | 37.7 | 39  | 16 | Pink      | 19.50 | 8.12 | 0.04 | Large colon displacement                              | Yes |
| Warm blood         | C | 12 | 37.6 | 48  | 14 | Pink      | 3.05  | 4.02 | 0.01 | Large colon displacement and pelvic flexure impaction | Yes |
| Hot-blooded        | F | 5  | 37.7 | 100 | 40 | Congested | 2.00  | 7.15 | 0.00 | Small intestinal volvulus                             | No  |
| Warm blood         | F | 7  | 35.5 | 44  | 12 | Pink      | 0.81  | 9.39 | 0.01 | Duodenitis and proximal jejunitis                     | Yes |

|                    |   |    |      |     |    |           |      |       |      |                                                      |     |
|--------------------|---|----|------|-----|----|-----------|------|-------|------|------------------------------------------------------|-----|
| Spanish Pure Breed | M | 5  | 39.1 | 76  | 32 | Congested | 0.77 | 7.30  |      | Colithis                                             | Yes |
| Lusitano           | M | 9  | 37.4 | 44  | 20 | Pink      | 0.61 | 9.80  | 0.30 | Gastric ulcers                                       | Yes |
| Donkey             | M | 8  | 37   | 48  | 24 | Pink      | 0.35 | 8.97  | 0.01 | Large colon impaction                                | Yes |
| Crossbreed         | M | 2  | 38.1 | 52  | 20 | Congested | 0.51 | 20.50 |      | Small intestinal volvulus                            | No  |
| Lusitano           | M | 16 | 37   | 60  | 24 |           | 1.02 | 10.28 | 0.19 | Sand                                                 | Yes |
| Hot-blooded        | M | 3  | 38   | 52  | 16 | Congested | 1.35 | 8.68  | 0.11 | Duodenitis and proximal jejunitis                    | Yes |
| Hot-blooded        | M | 8  | 37.2 | 36  | 16 | Pink      | 1.08 |       |      | Duodenitis and proximal jejunitis and gastric ulcers | Yes |
| Spanish Pure Breed | M | 6  | 37.7 | 40  | 16 | Congested | 2.12 | 3.00  | 0.02 | Inguinal hernia                                      | Yes |
| Hot-blooded        | F | 9  | 37.9 | 48  | 12 | Pink      | 1.64 | 7.01  | 0.00 | Uterine torsion                                      | Yes |
| Crossbreed         | M | 6  | 37.9 | 40  | 16 | Congested | 0.38 | 6.74  | 0.30 | Large colon impaction                                | Yes |
| Spanish Pure Breed | M | 9  |      | 100 | 24 | Congested | 2.01 | 4.30  |      | Gastric rupture                                      | No  |

|                    |   |    |      |     |    |           |      |      |      |                                   |     |
|--------------------|---|----|------|-----|----|-----------|------|------|------|-----------------------------------|-----|
| Warm-blood         | M | 5  | 37.8 | 44  | 16 | Pink      | 0.27 | 2.70 | 0.01 | Large colon displacement          | Yes |
| LuYestaNo          | F | 9  | 37   | 84  | 70 | Congested | 0.45 |      |      | Small intestinal volvulus         | No  |
| Crossbreed         | F | 10 | 37.9 | 96  | 24 | Congested | 1.64 | 5.00 |      | Fecalith                          | No  |
| Hot-blooded        | F | 10 | 37.6 | 36  | 12 | Pink      | 1.25 | 4.87 | 0.03 | Small intestine enteritis         | Yes |
| Hot-blooded        | F | 10 | 38.5 | 100 | 24 | Congested | 1.83 | 5.01 | 0.01 | Colithis                          | No  |
| Spanish Pure Breed | M | 18 |      |     |    |           | 0.54 |      |      | Large colon impaction             |     |
| Crossbreed         | F | 18 | 36.9 | 60  | 60 | Congested | 0.91 | 6.50 |      | Duodenitis and proximal jejunitis | Yes |
|                    | M |    | 39.2 | 76  | 29 | Pink      | 0.52 | 9.90 | 0.10 | Small intestine enteritis         | Yes |
| Crossbreed         | C | 10 | 37.8 | 60  | 26 | Pink      | 2.26 |      |      | Duodenitis and proximal jejunitis | Yes |

yo, years-old; HR, heart rate; bpm, pulses per minute; RR, respiratory rate; bpm, breaths per minute; WCB, white blood cell count; EC, eosinophils count.
